# Supplementary material for: Oxidative addition of disulfide/diselenide to group 10 metal(0) and in situ functionalization to form neutral thiasalen/selenasalen group 10 metal(ii) complexes
Source: Royal Society of Chemistry journal article supplement (doi:10.1039/c3dt52132j), 2013-10-15
Supplement: c3dt52132j.pdf [file c3dt52132j.pdf]

## Supporting Information

### Oxidative Addition of Disulfide/Diselenide to Group 10 Metal(0) and *in situ* Functionalization to Form Neutral Thiasalen/Selanasalen Group 10 Metal(II) Complexes

Pradip Kr. Dutta, Ashish K. Asatkar, Sanjio S. Zade\*, Snigdha Panda\*

*Department of Chemical Sciences, Indian Institute of Science Education and Research, Kolkata,  
PO: BCKV campus main office, Mohanpur 741252, Nadia, West Bengal, India.*

*Email: [snigdha@iiserkol.ac.in](mailto:snigdha@iiserkol.ac.in), [sanjiozade@iiserkol.ac.in](mailto:sanjiozade@iiserkol.ac.in)*

#### Table of contents

| Sr. No. | Title                                                                                                                                | Page No. |
|---------|--------------------------------------------------------------------------------------------------------------------------------------|----------|
| 1.      | <b>Fig. S1</b> 2D sheet in complex <b>16</b> formed <i>via</i> C-H... $\pi$ , CH...H, CH...S interactions along <i>bc</i> plane.     | S2       |
| 2.      | <b>Fig. S2</b> 2D sheet 1n complex <b>16</b> formed along <i>ac</i> plane by intermolecular S1...H2B and H5...H14 interactions.      | S2       |
| 3.      | <b>Fig. S3</b> 1D chain growth in complex <b>17</b> along <i>b</i> axis through intermolecular C-H... $\pi$ and Se...H interactions. | S3       |
| 4.      | <b>Fig. S4</b> One dimensional assembly in complex <b>18</b> <i>via</i> intermolecular C-H... $\pi$ and H...C interactions.          | S3       |
| 5.      | <b>Fig. S5</b> $^1\text{H}$ NMR spectrum of complex <b>14</b> .                                                                      | S4       |
| 6.      | <b>Fig. S6</b> $^{13}\text{C}$ NMR spectrum of complex <b>14</b> .                                                                   | S4       |
| 7.      | <b>Fig. S7</b> $^1\text{H}$ NMR spectrum of complex <b>15</b> .                                                                      | S5       |
| 8.      | <b>Fig. S8</b> $^{13}\text{C}$ NMR spectrum of complex <b>15</b>                                                                     | S5       |
| 9.      | <b>Fig. S9</b> $^1\text{H}$ NMR spectrum of complex <b>16</b> .                                                                      | S6       |
| 10.     | <b>Fig. S10</b> $^{13}\text{C}$ NMR spectrum of complex <b>16</b> .                                                                  | S6       |
| 11.     | <b>Fig. S11</b> $^1\text{H}$ NMR spectrum of complex <b>17</b> .                                                                     | S7       |
| 12.     | <b>Fig. S12</b> $^{13}\text{C}$ NMR spectrum of complex <b>17</b> .                                                                  | S7       |
| 13.     | <b>Fig. S13</b> $^{77}\text{Se}$ NMR spectrum of complex <b>17</b> .                                                                 | S8       |
| 14.     | <b>Fig. S14</b> $^1\text{H}$ NMR spectrum of complex <b>18</b> .                                                                     | S8       |
| 15.     | <b>Fig. S15</b> $^{13}\text{C}$ NMR spectrum of complex <b>18</b> .                                                                  | S9       |
| 16.     | <b>Fig. S16</b> $^{77}\text{Se}$ NMR spectrum of complex <b>18</b> .                                                                 | S9       |
| 17.     | <b>Fig. S17</b> $^1\text{H}$ NMR spectrum of complex <b>19</b> .                                                                     | S10      |
| 18.     | <b>Fig. S18</b> $^{13}\text{C}$ NMR spectrum of complex <b>19</b> .                                                                  | S10      |
| 19.     | <b>Fig. S19</b> $^{77}\text{Se}$ NMR spectrum of complex <b>19</b> .                                                                 | S11      |

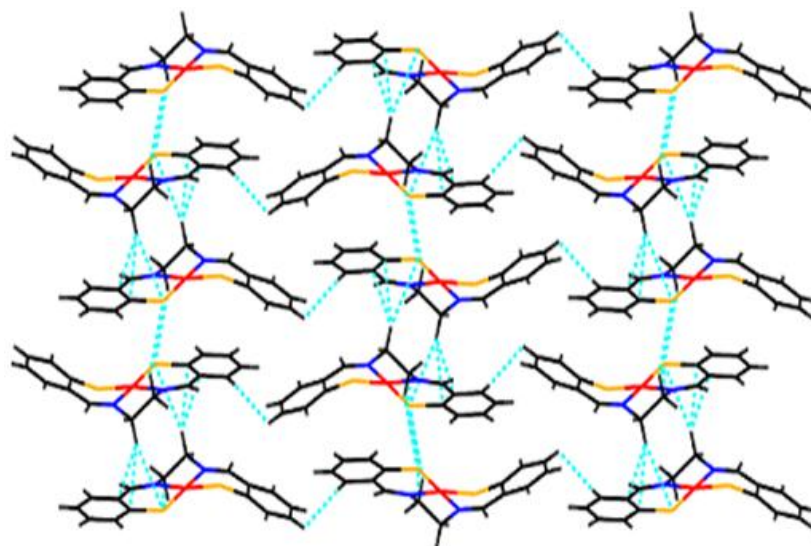

**Fig. S1** 2D sheets in complex **16** formed *via* C-H... $\pi$ , CH...H, CH...S interactions along *bc* plane.

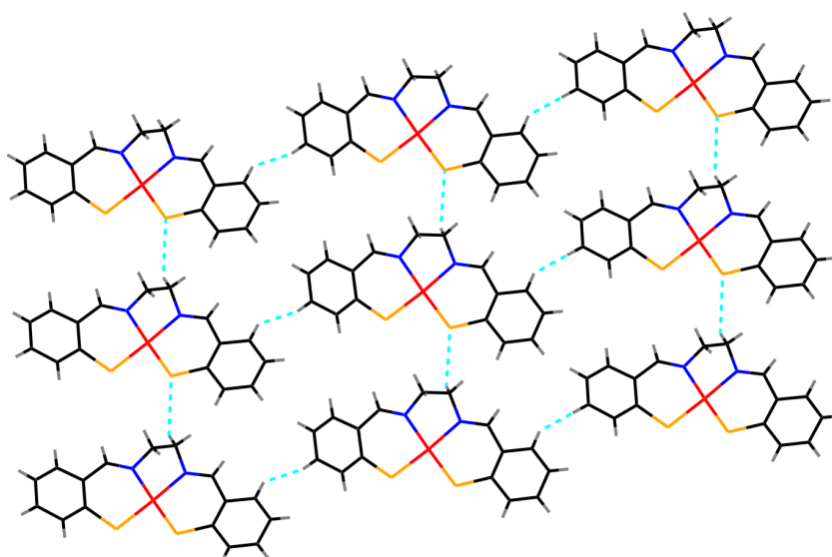

**Fig. S2.** 2D sheet 1n complex **16** formed along *ac* plane by intermolecular S1...H2B and H5...H14 interactions.

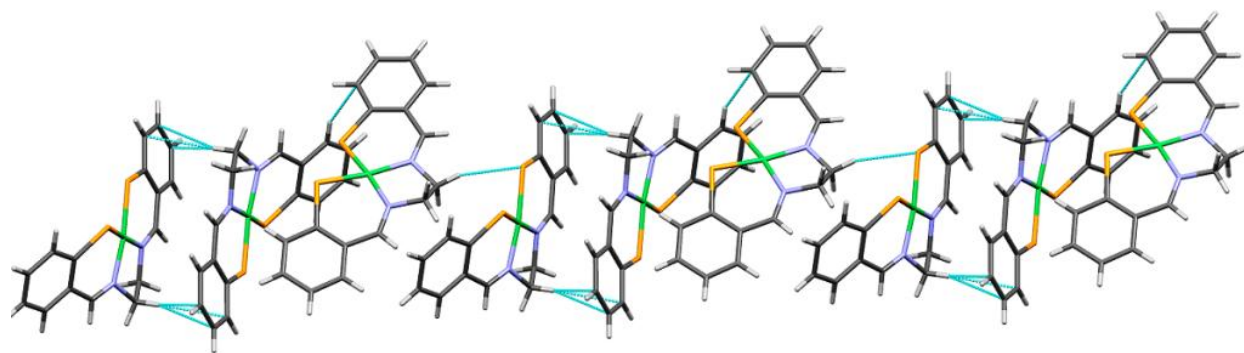

**Fig. S3** 1D chain growth in complex **17** along *b* axis through intermolecular C-H... $\pi$  and Se...H interactions.

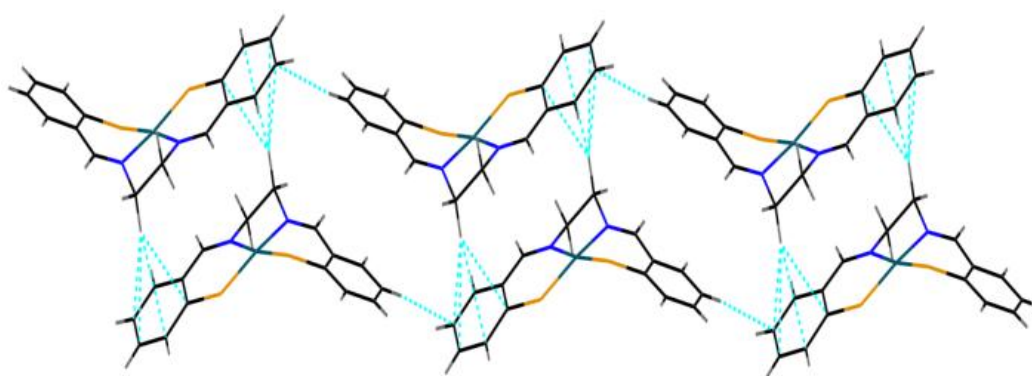

(a)

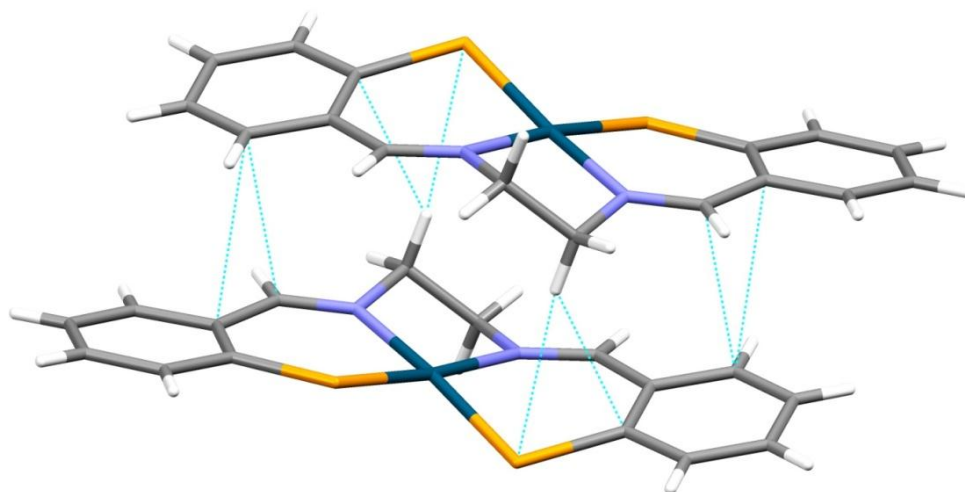

(b)

**Fig. S4** Crystal packing diagram of **18** showing intermolecular (a) C-H... $\pi$  and (b)  $\pi$ ... $\pi$  and Se...H short contacts interactions.

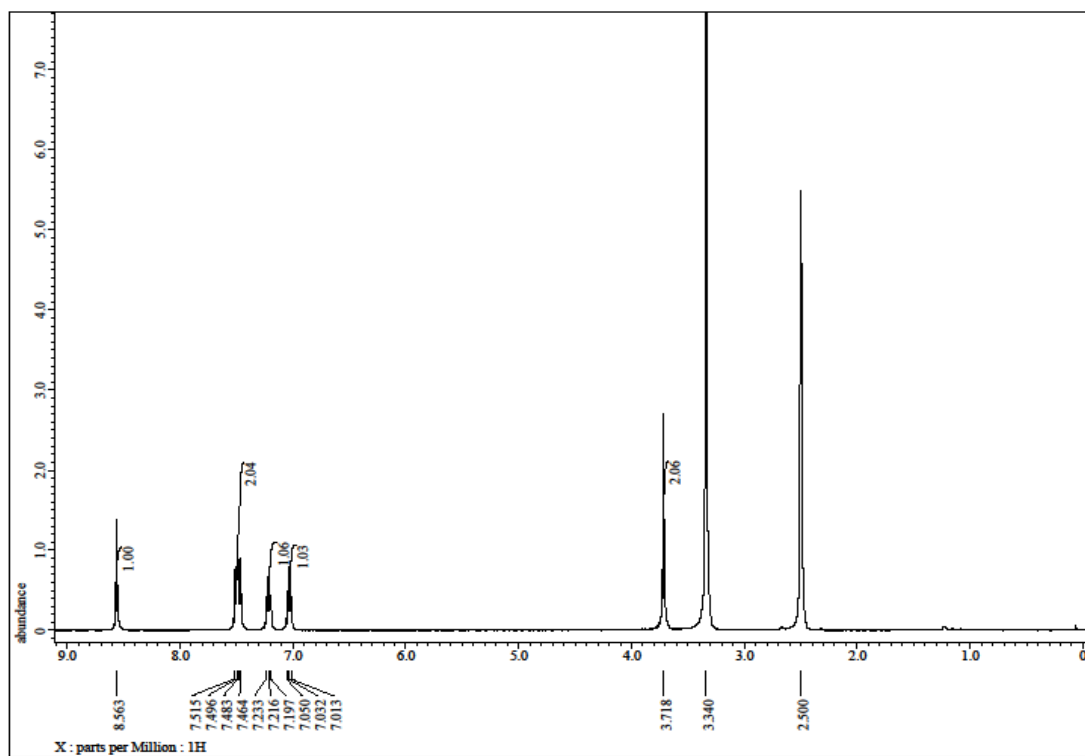

Fig. S5 <sup>1</sup>H NMR spectrum of complex 14.

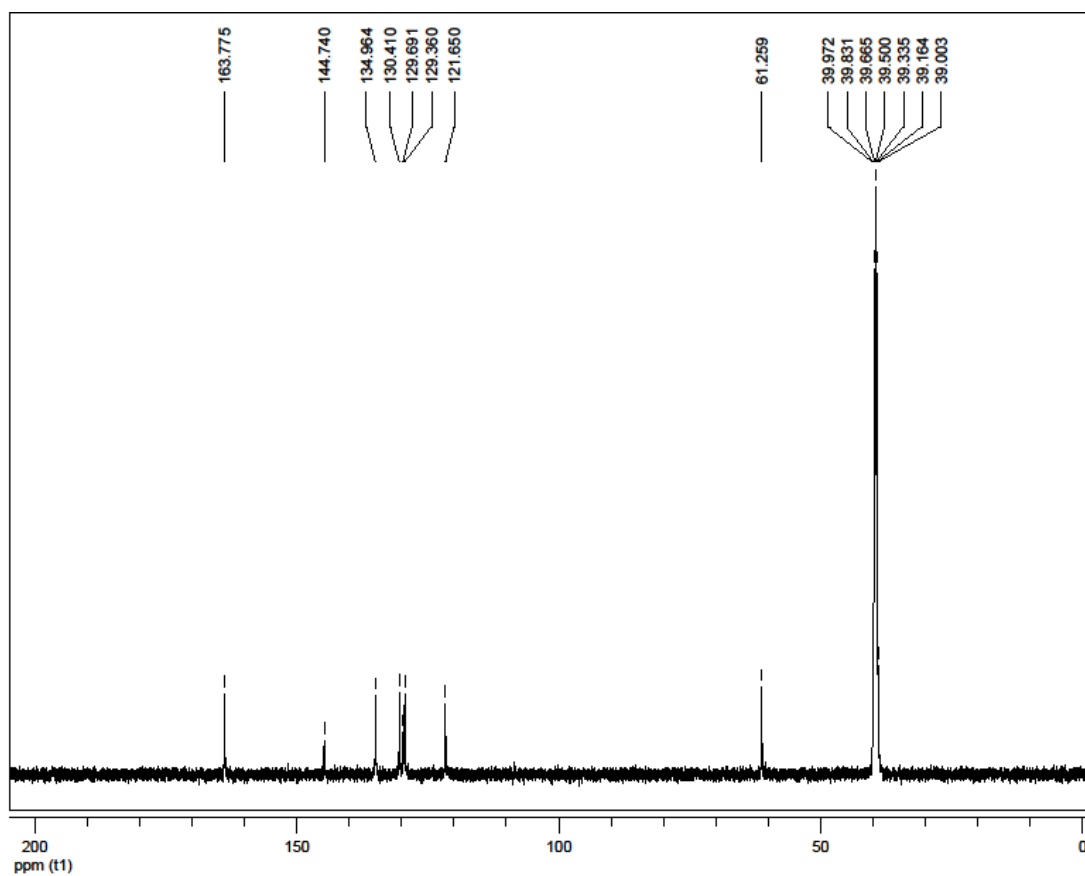

Fig. S6 <sup>13</sup>C NMR spectrum of complex 14.

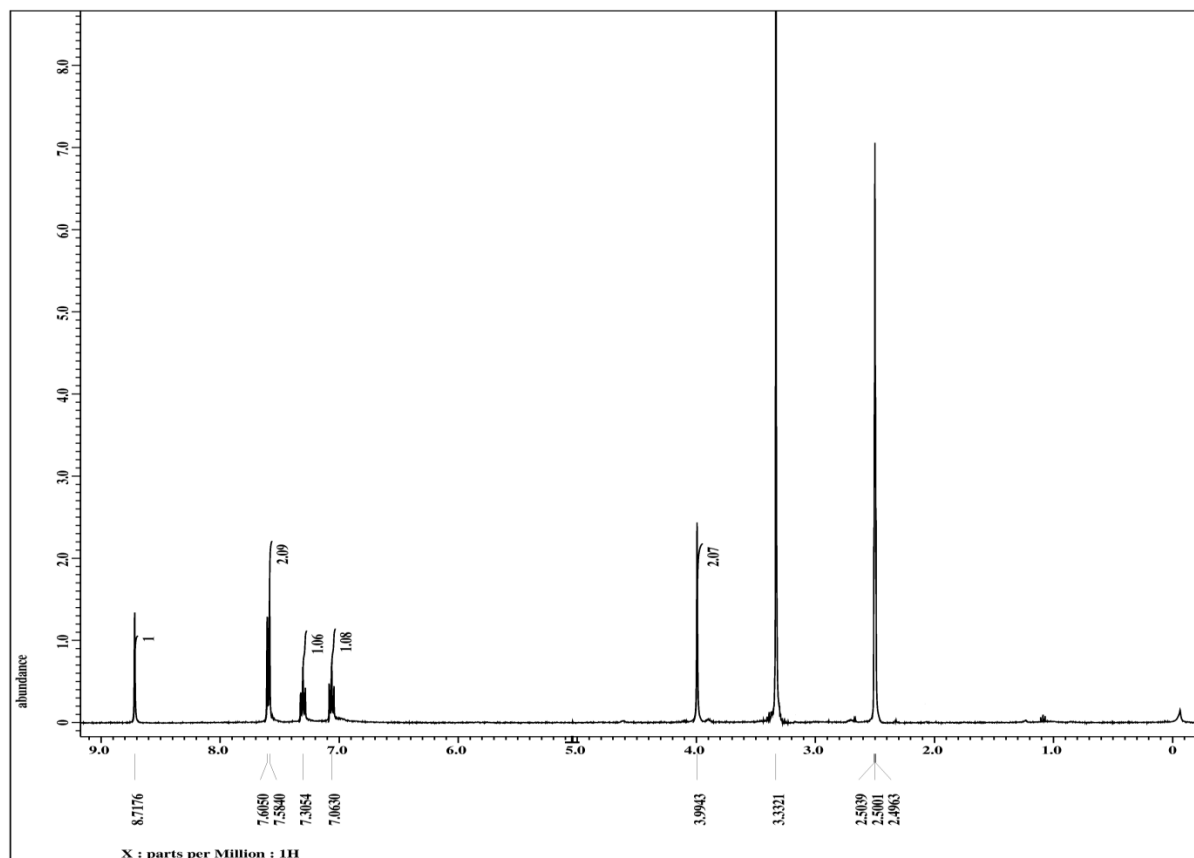

Fig. S7  $^1\text{H}$  NMR spectrum of complex 15.

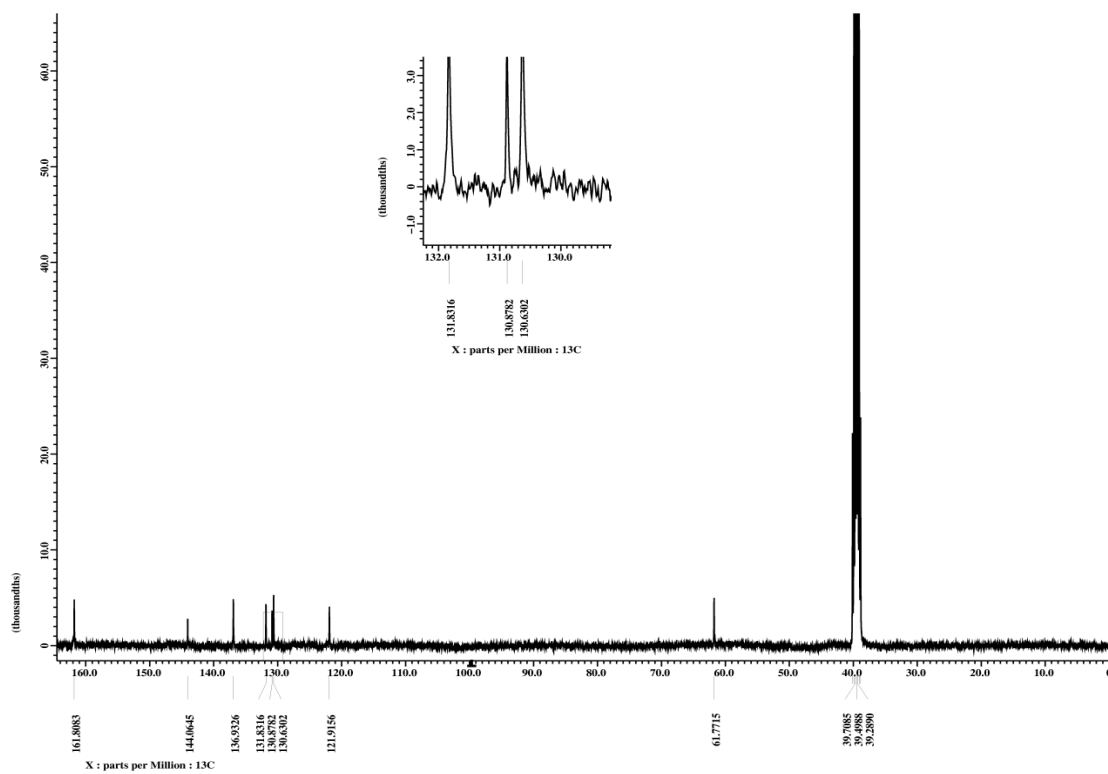

Fig. S8  $^{13}\text{C}$  NMR spectrum of complex 15

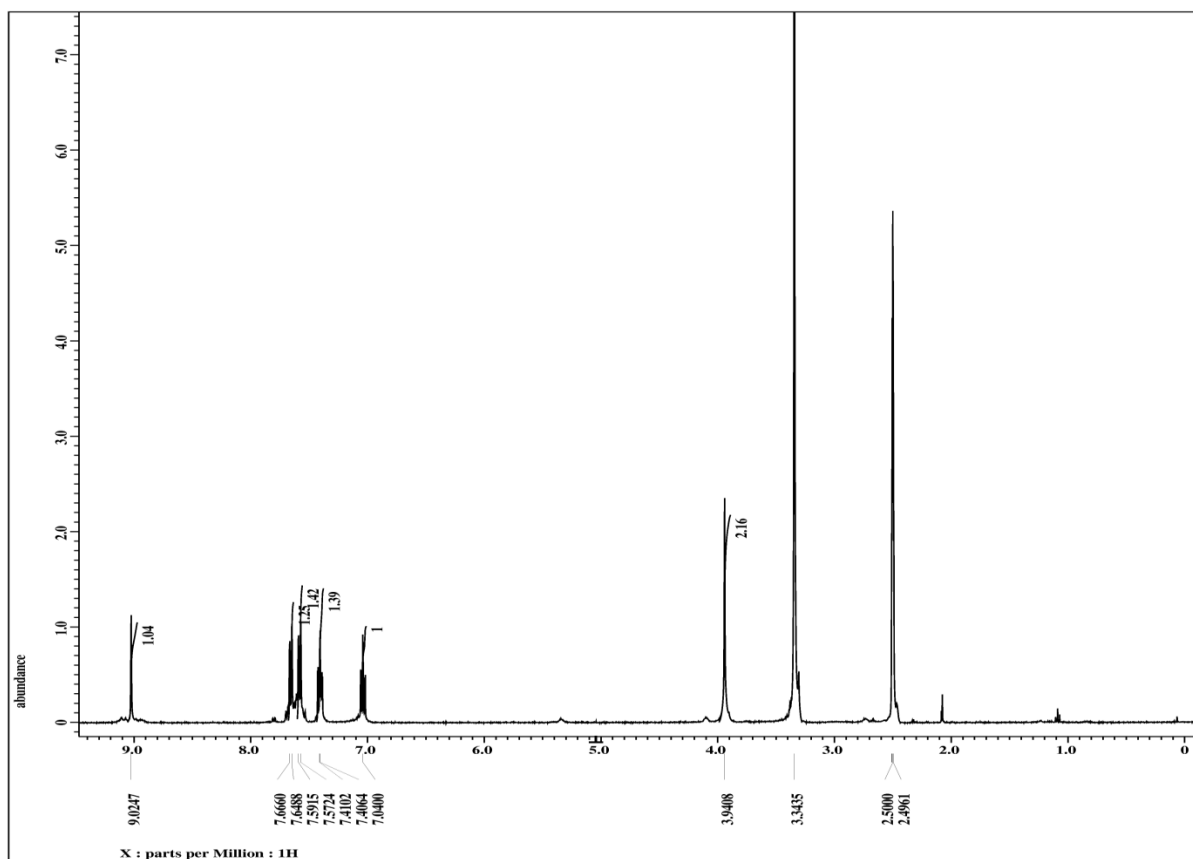

Fig. S9 <sup>1</sup>H NMR spectrum of complex 16.

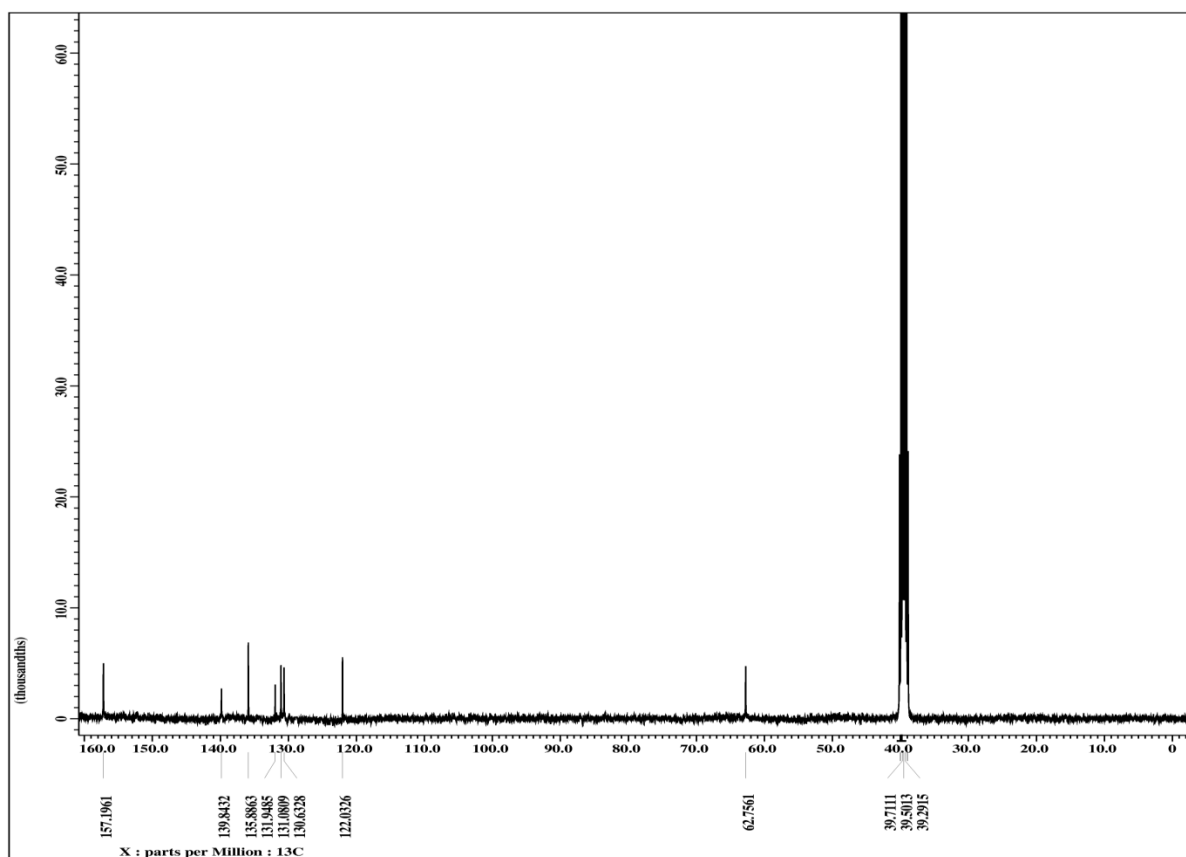

Fig. S10 <sup>13</sup>C NMR spectrum of complex 16.

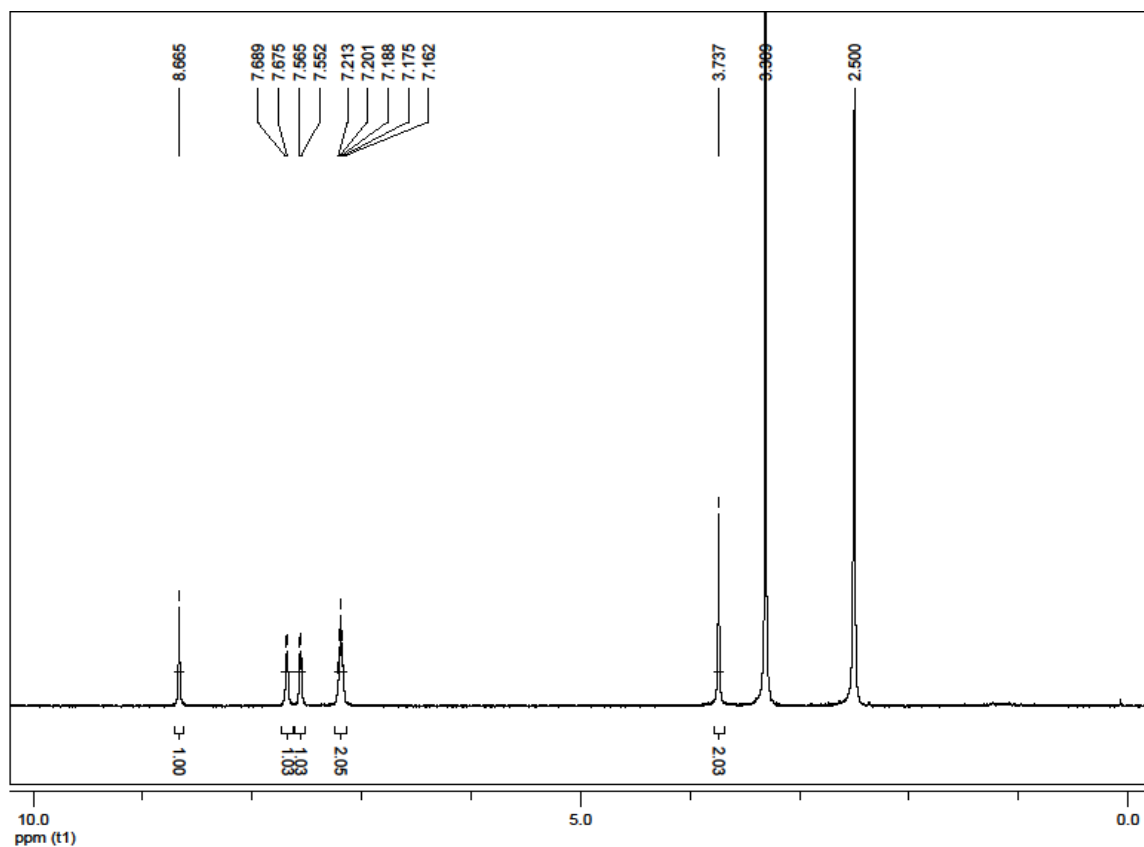

Fig. S11  $^1\text{H}$  NMR spectrum of complex 17.

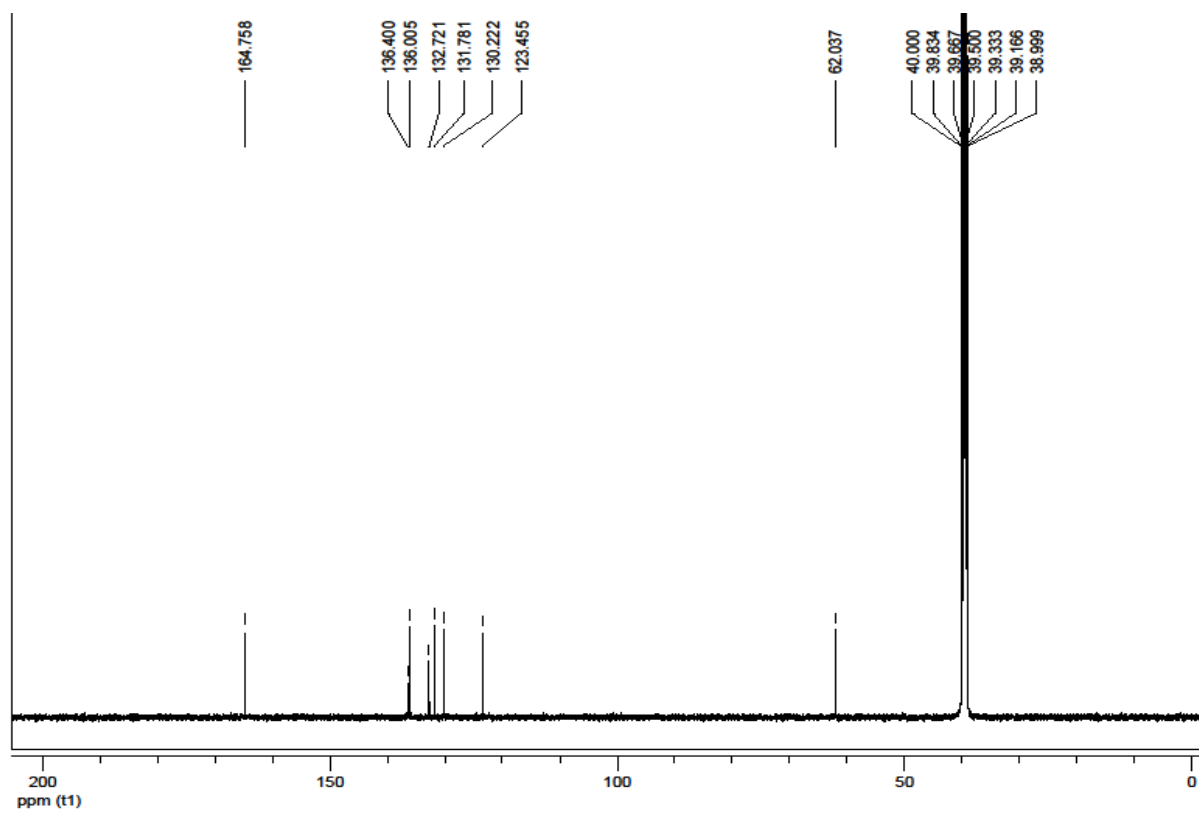

Fig. S12  $^{13}\text{C}$  NMR spectrum of complex 17.

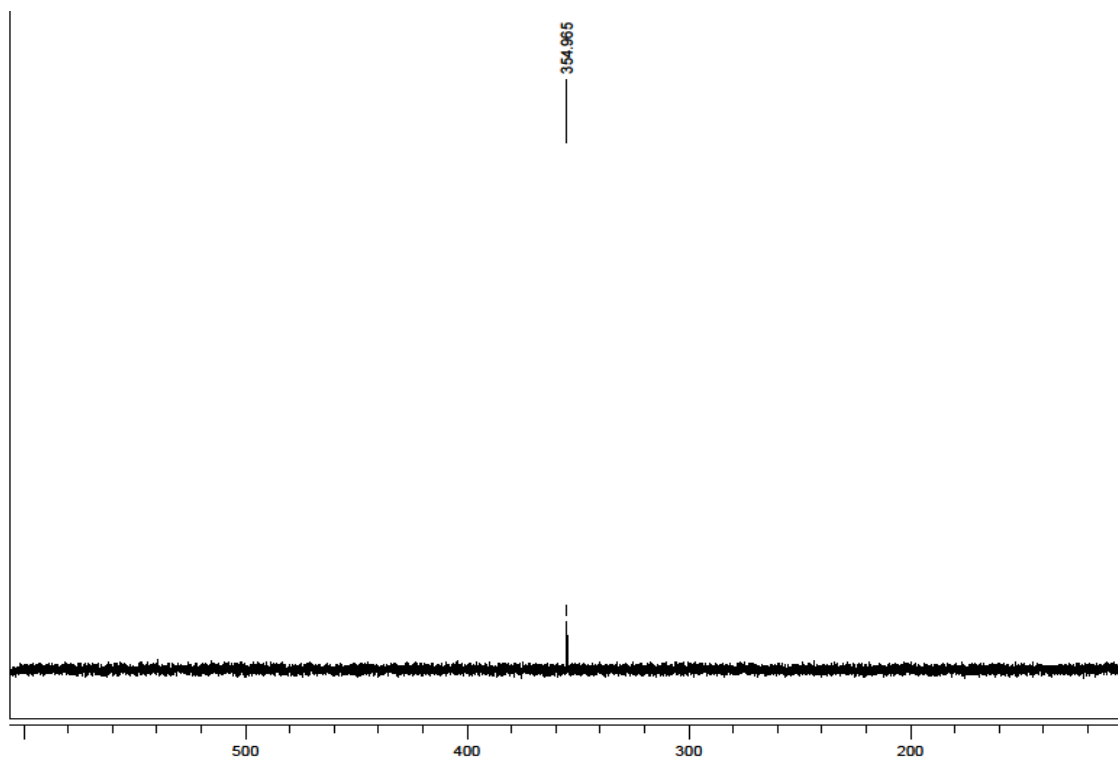

Fig. S13  $^{77}\text{Se}$  NMR spectrum of complex 17.

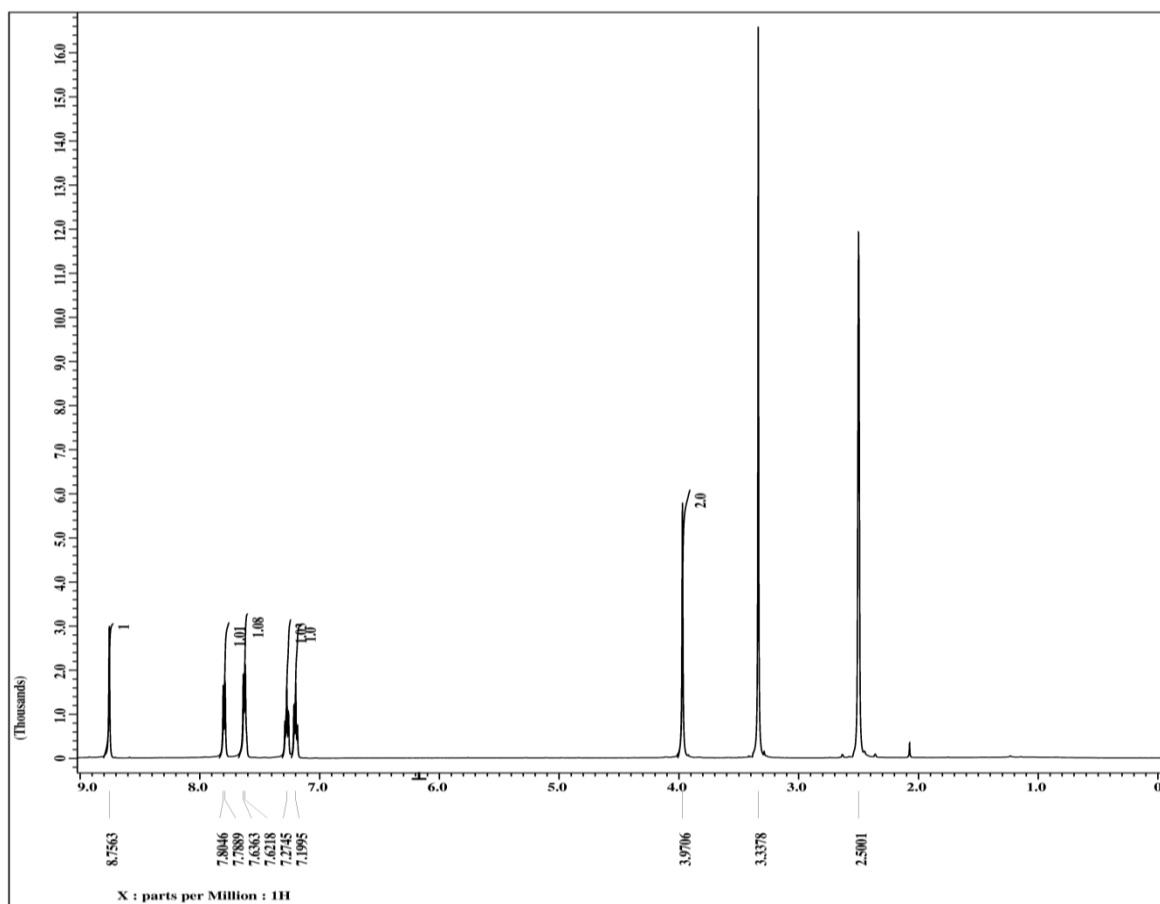

Fig. S14  $^1\text{H}$  NMR spectrum of complex 18.



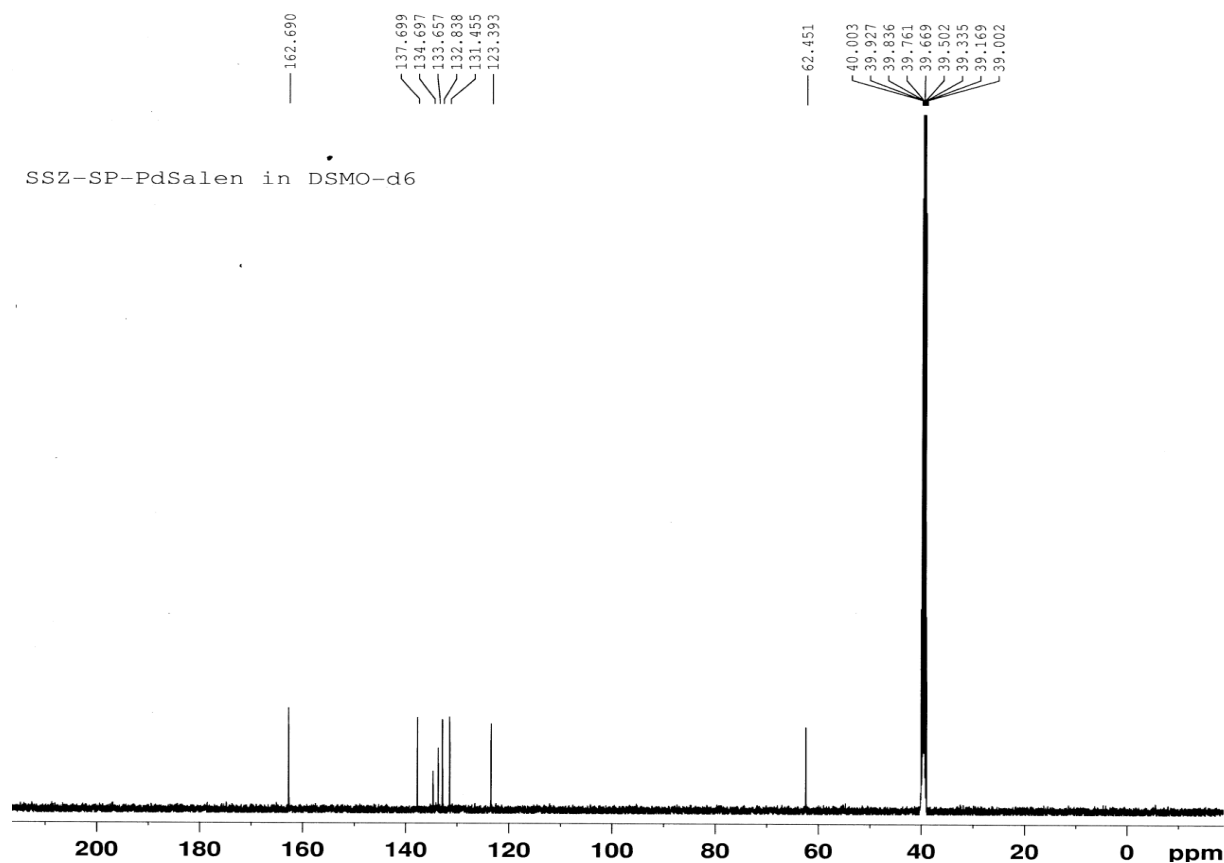

Fig. S15  $^{13}\text{C}$  NMR spectrum of complex 18.

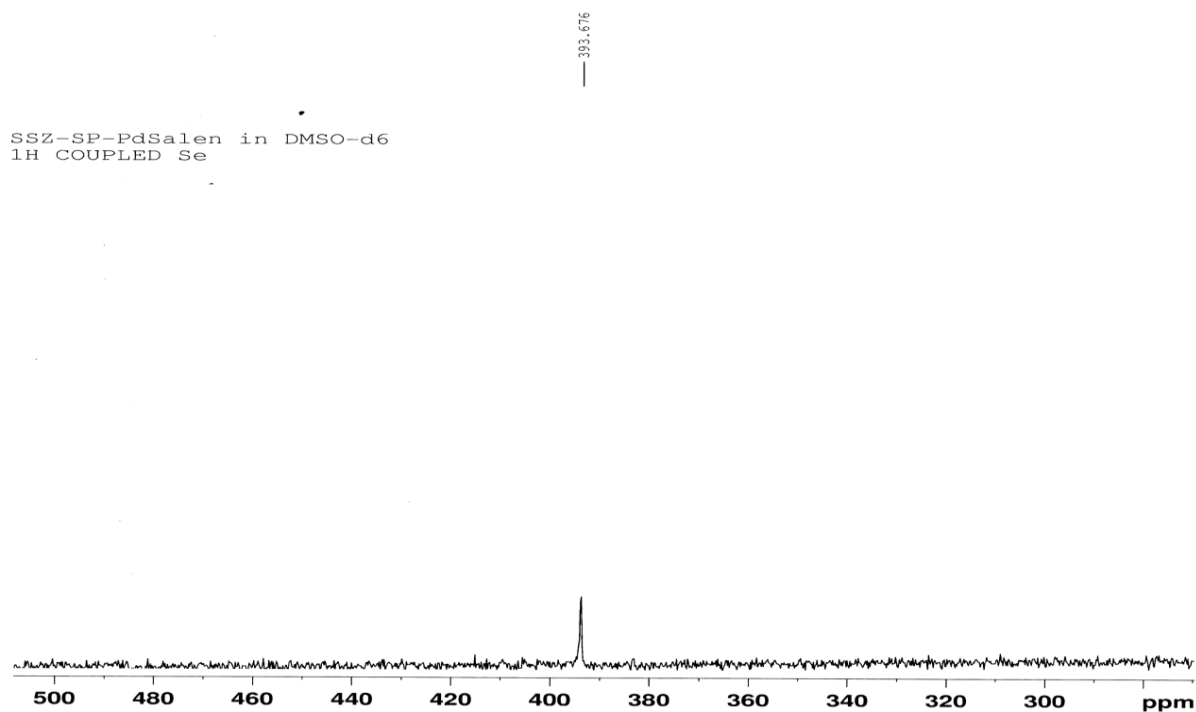

Fig. S16  $^{77}\text{Se}$  NMR spectrum of complex 18.

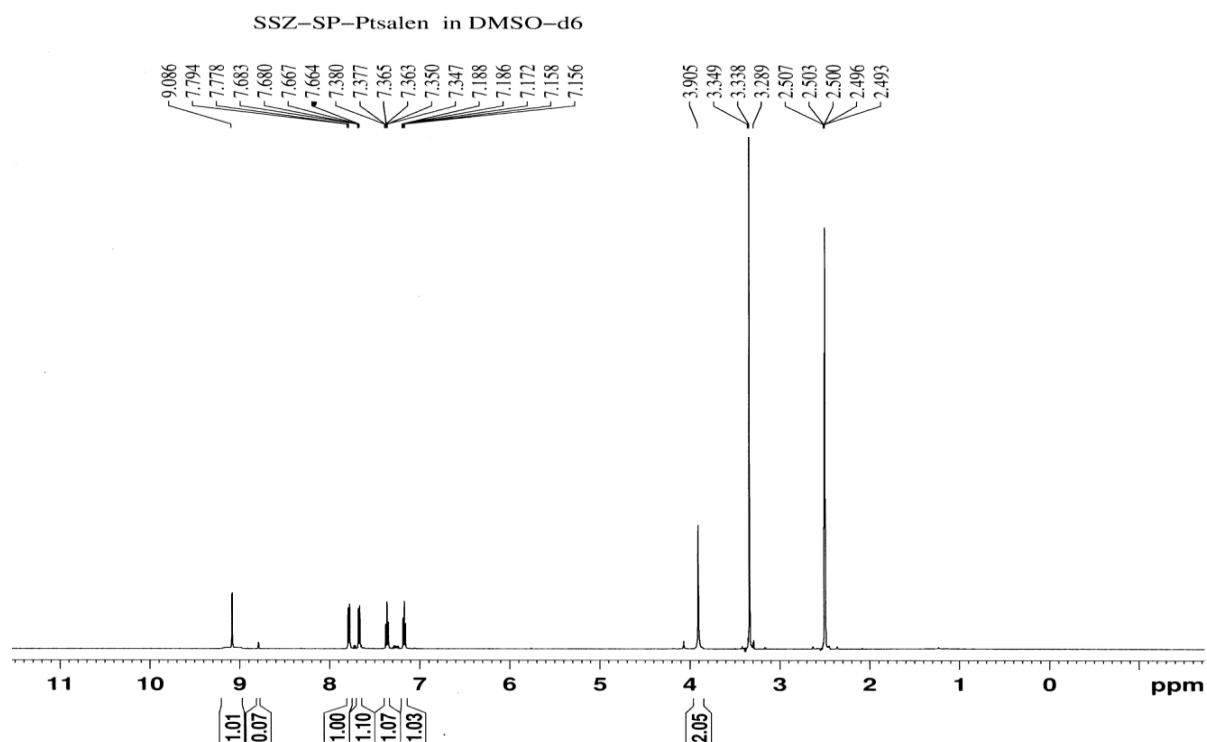

Fig. S17  $^1\text{H}$  NMR spectrum of complex **19**.

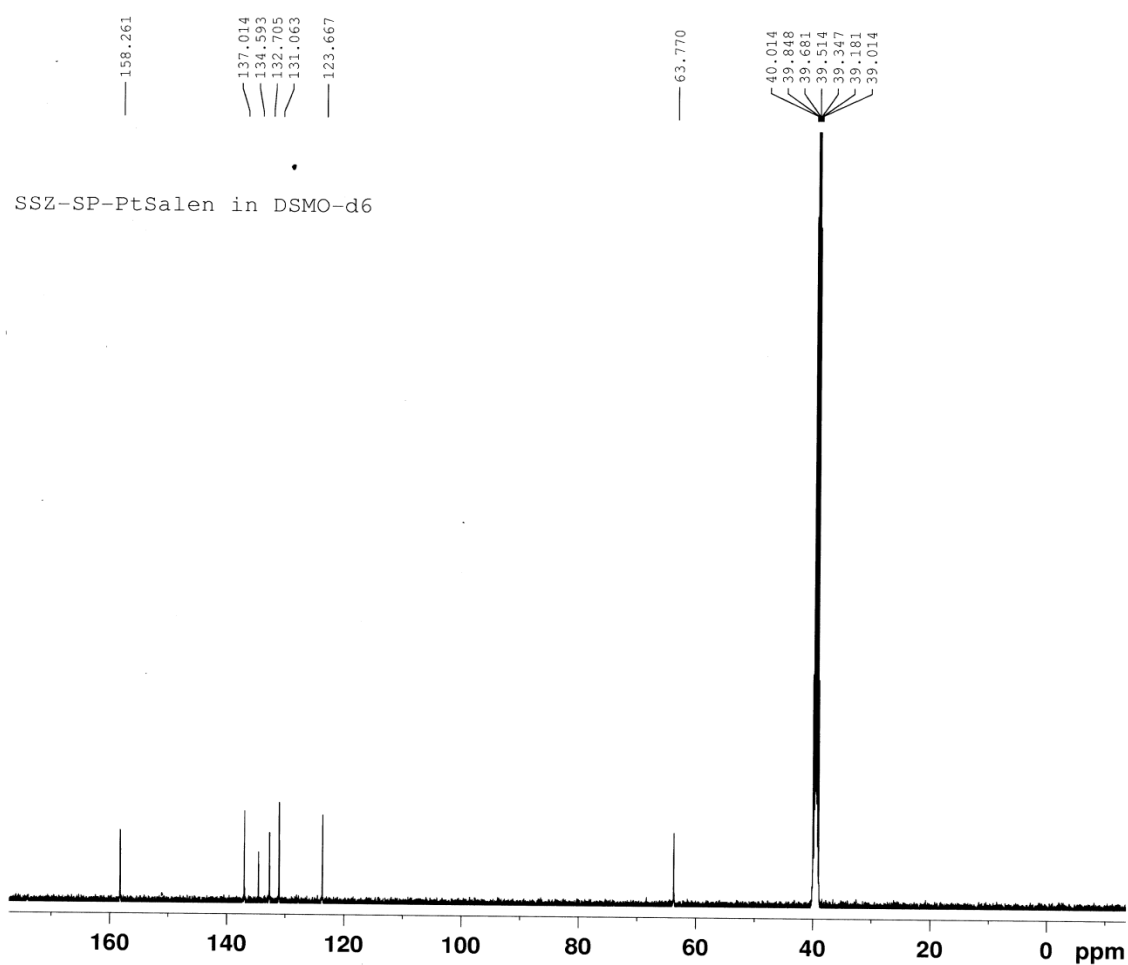

Fig. S18  $^{13}\text{C}$  NMR spectrum of complex **19**.

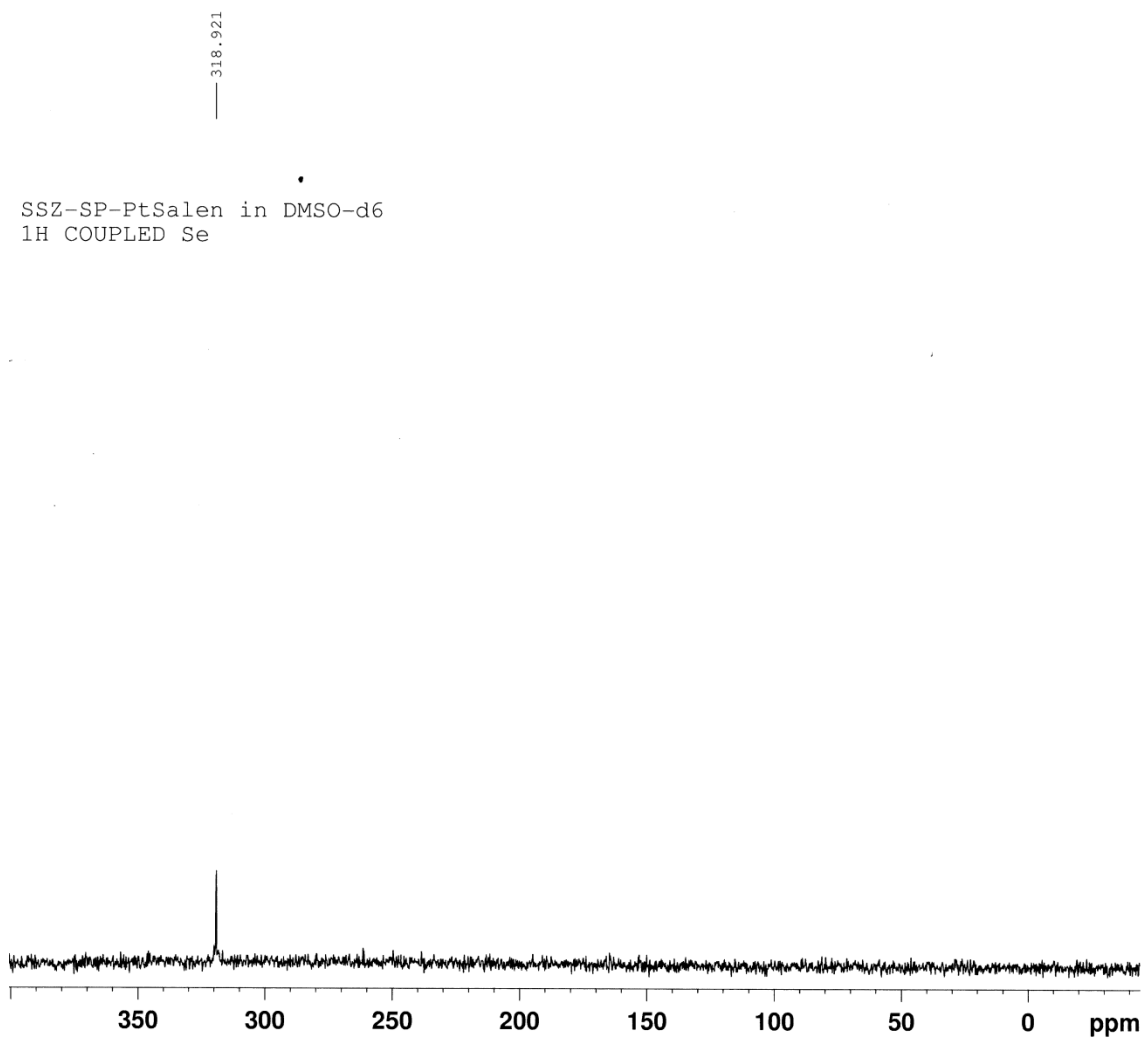

**Fig. S19**  $^{77}\text{Se}$  NMR spectrum of complex **19**.
